# Supplementary material for: The IL-4/STAT6 signaling axis establishes a conserved microRNA signature in human and mouse macrophages regulating cell survival via miR-342-3p
Source: PubMed Central journal article supplement (PMC4886428; doi:10.1186/s13073-016-0315-y), 2016-05-31
Supplement: 13073_2016_315_MOESM4_ESM.pdf [file 13073_2016_315_MOESM4_ESM.pdf]

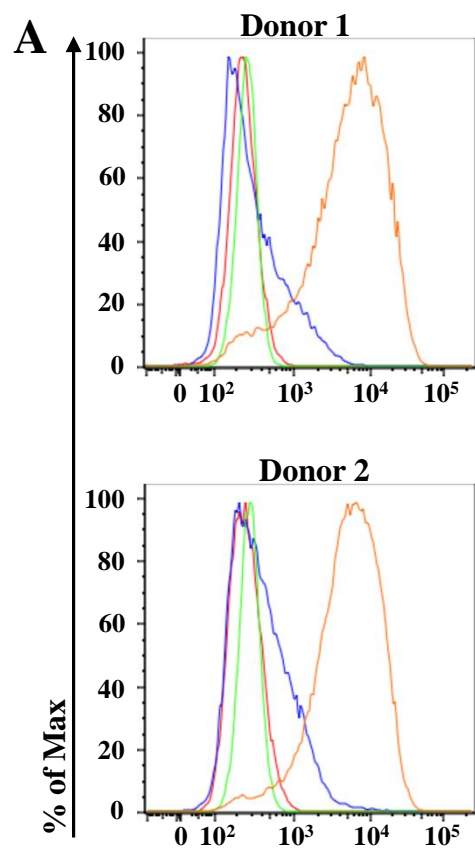

Unstimulated - Isotype control  
 Unstimulated - CD206  
 IL-4 - Isotype control  
 IL-4 - CD206

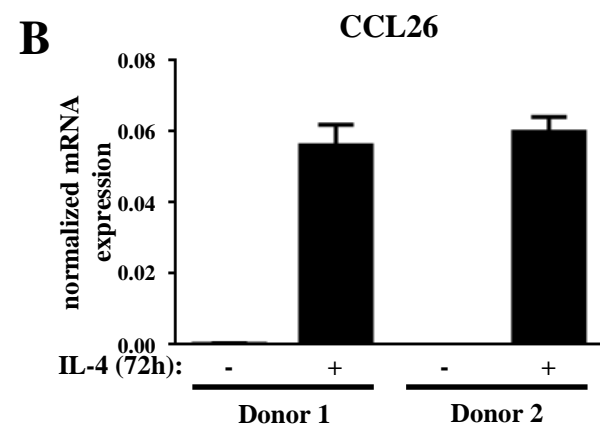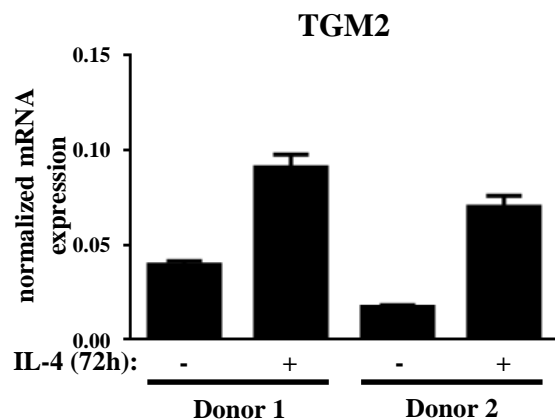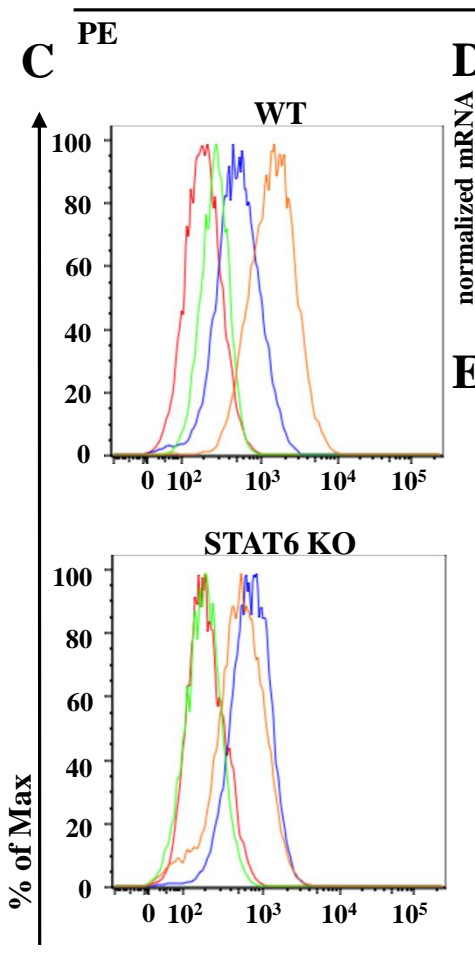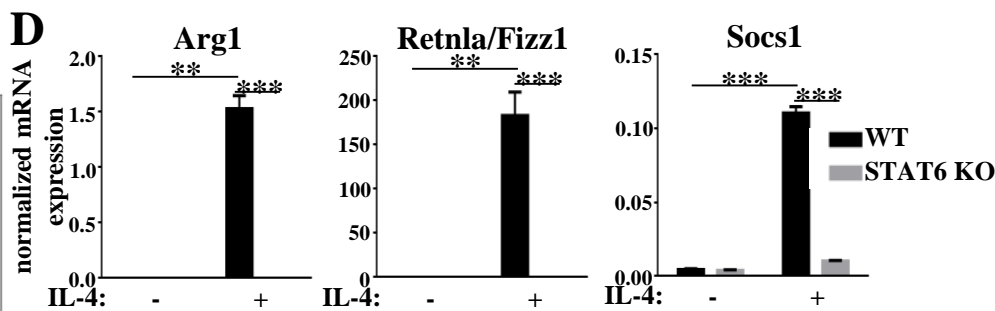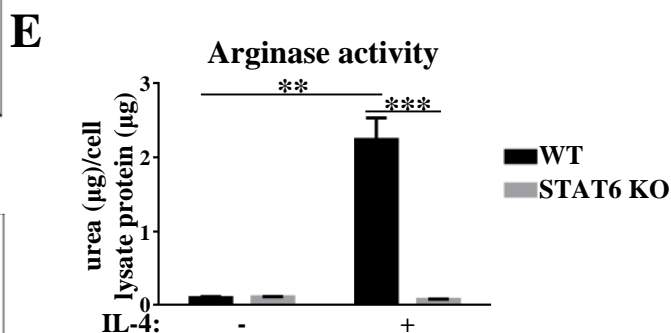

**Verification of human and mouse alternative macrophage activation based on measurement of alternative macrophage activation markers.** (A) Cell surface CD206 expression on two independent human donor-derived 72 hours nontreated and IL-4-stimulated macrophages. (B) CCL26 and TGM2 expression at mRNA level in two independent human donor-derived 72 hours nontreated and IL-4-stimulated macrophages. Error bars indicate the standard deviation (SD) of the three technical replicates. (C) Cell surface CD206 expression on IL-4-stimulated or unstimulated WT and STAT6 KO mouse BMDMs. (D) Arg1, Retnla/Fizz1 and Socs1 expression at RNA level in IL-4-stimulated or unstimulated WT and STAT6 KO mouse BMDMs. Each data point represents the mean and SD of three/three (WT/Stat6 KO) individual animals. \* $P < 0.05$ , \*\* $P < 0.01$ , \*\*\* $P < 0.001$ . (E) Arginase activity in IL-4-stimulated or unstimulated WT and STAT6 KO mouse BMDMs. Each data point represents the mean and SD of three/three (WT/Stat6 KO) individual animals. \* $P < 0.05$ , \*\* $P < 0.01$ , \*\*\* $P < 0.001$ .

**FITC**

Unstimulated - Isotype control  
 Unstimulated - CD206  
 IL-4 - Isotype control  
 IL-4 - CD206
