# Supplementary material for: The IL-4/STAT6 signaling axis establishes a conserved microRNA signature in human and mouse macrophages regulating cell survival via miR-342-3p
Source: PubMed Central journal article supplement (PMC4886428; doi:10.1186/s13073-016-0315-y), 2016-05-31
Supplement: 13073_2016_315_MOESM6_ESM.pdf [file 13073_2016_315_MOESM6_ESM.pdf]

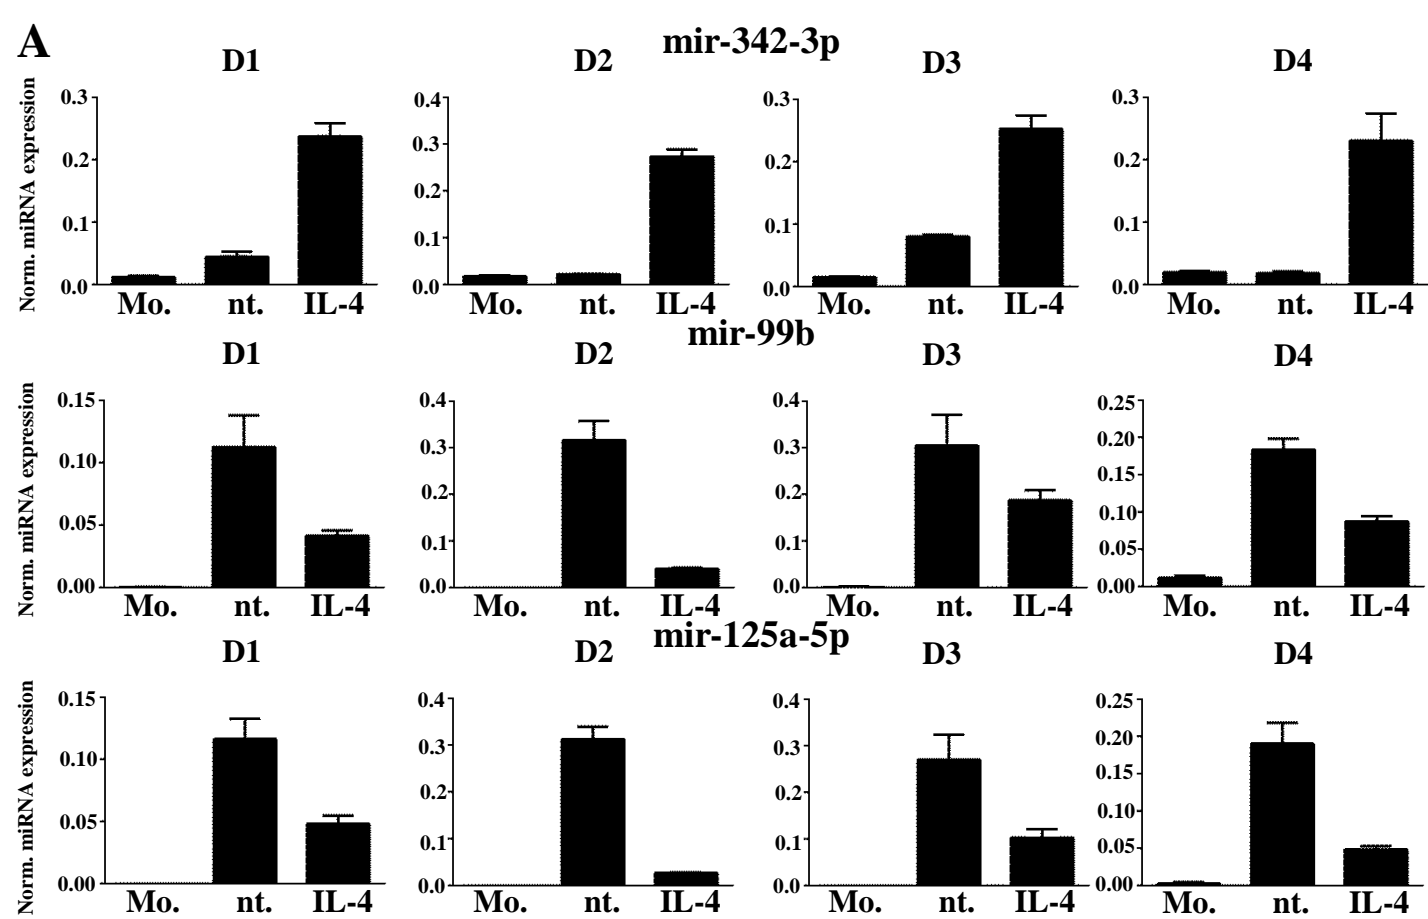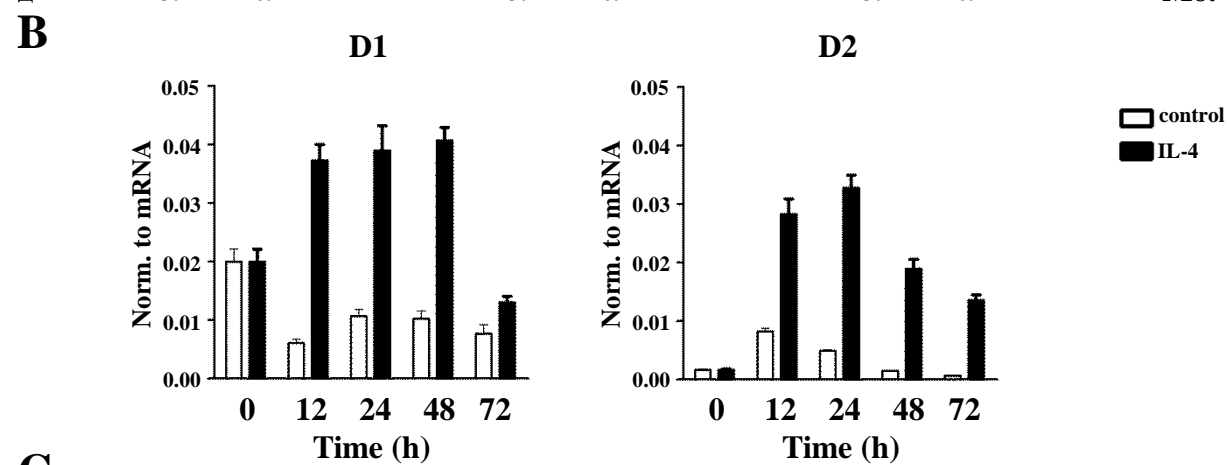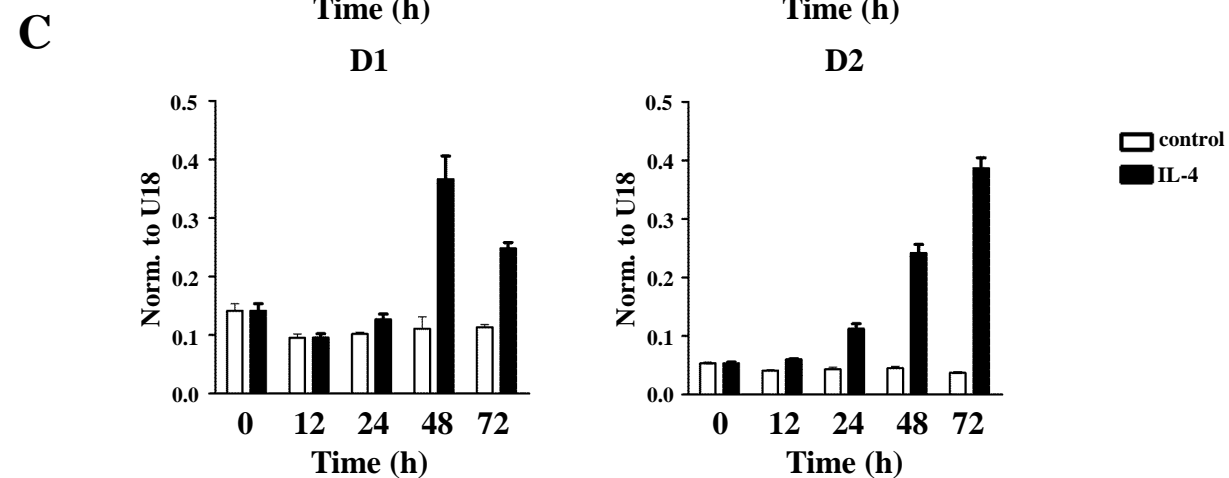

**Mir-342-3p, miR-193b, miR-99b, miR-125a-5p and EVL expression in human donors-derived monocytes and macrophages.** (A) MiR-342-3p, miR-193b, miR-99b and miR-125a-5p expression in four (D1-D4) independent human donor-derived monocytes, 72 hours nontreated and IL-4 stimulated macrophages. Error bars indicate the standard deviation (SD) of the three technical replicates. (B) EVL expression in two other (D2, D3) human donor-derived differentiating macrophages in the absence or presence of IL-4. Error bars indicate the standard deviation (SD) of the three technical replicates. (C) MiR-342-3p in two other (D2, D3) human donor-derived differentiating macrophages in the absence or presence of IL-4. Error bars indicate the standard deviation (SD) of the three technical replicates.
